# Supplementary material for: Sodium tungsten bronze-supported Pt electrocatalysts for the high-performance hydrogen evolution reaction
Source: Royal Society of Chemistry journal article supplement (doi:10.1039/d2cy00577h), 2022-01-01
Supplement: d2cy00577h1.pdf [file d2cy00577h1.pdf]

## Sodium Tungsten Bronze-Supported Pt Electrocatalysts for High-Performance Hydrogen Evolution Reaction

Jin Li,<sup>a</sup> Jiajun Wang,<sup>\*b</sup> Yu Liu,<sup>a</sup> Changzhou Yuan,<sup>\*c</sup> Guilong Liu,<sup>a</sup> Naiteng Wu<sup>\*a</sup> and Xianming Liu<sup>\*a</sup>

<sup>a</sup>*College of Chemistry and Chemical Engineering, and Henan Key Laboratory of Function-Oriented Porous Materials, Luoyang Normal University, Luoyang 471934, China, E-mail: myclxm@163.com, wunaiteng@gmail.com*

<sup>b</sup>*Tianjin Key Laboratory of Structure and Performance for Functional Molecules; College of Chemistry, Tianjin Normal University, Tianjin 300387, China, E-mail: hxxywjj@tjnu.edu.cn*

<sup>c</sup>*School of Materials Science & Engineering, University of Jinan, Jinan, 250022 P. R. China, E-mail: mse\_yuancz@ujn.edu.cn*

*\*Corresponding authors*

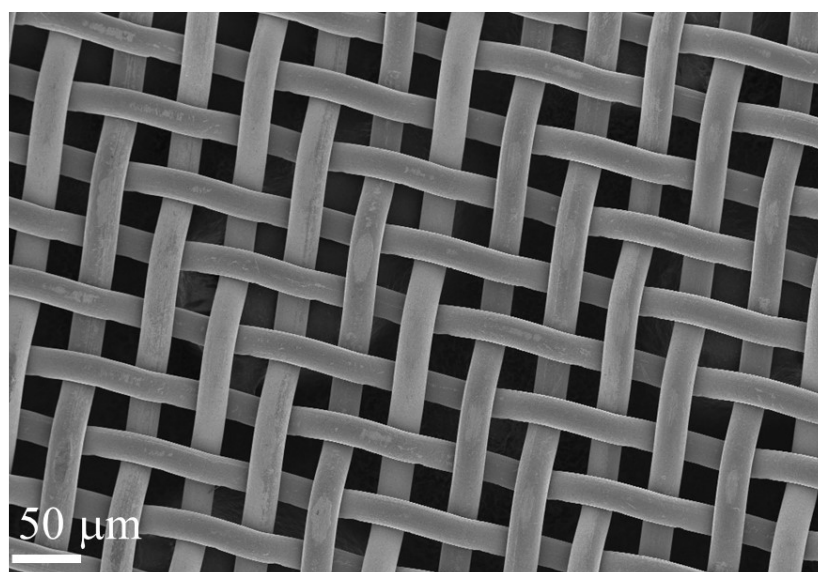

**Figure S1.** FESEM image of the bare SM.

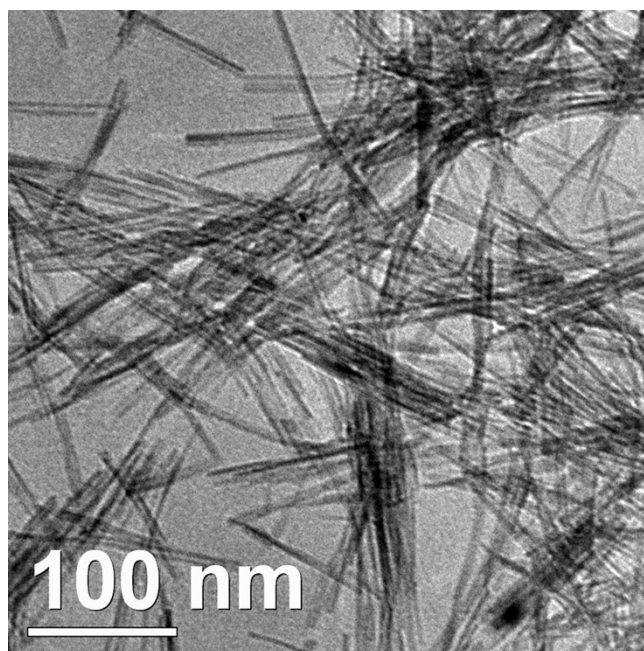

**Figure S2.** TEM image of  $\text{Na}_x\text{WO}_3$  nanotube.

It is difficult to observe the nanotube-like morphology of  $\text{Na}_x\text{WO}_3$  bundle due to the aggregation, we can indirectly investigate its morphology. After ultrasonic treatment for 5 h, the  $\text{Na}_x\text{WO}_3$  bundle can be disassembled to single  $\text{Na}_x\text{WO}_3$  nanotube as shown in Figure S2.

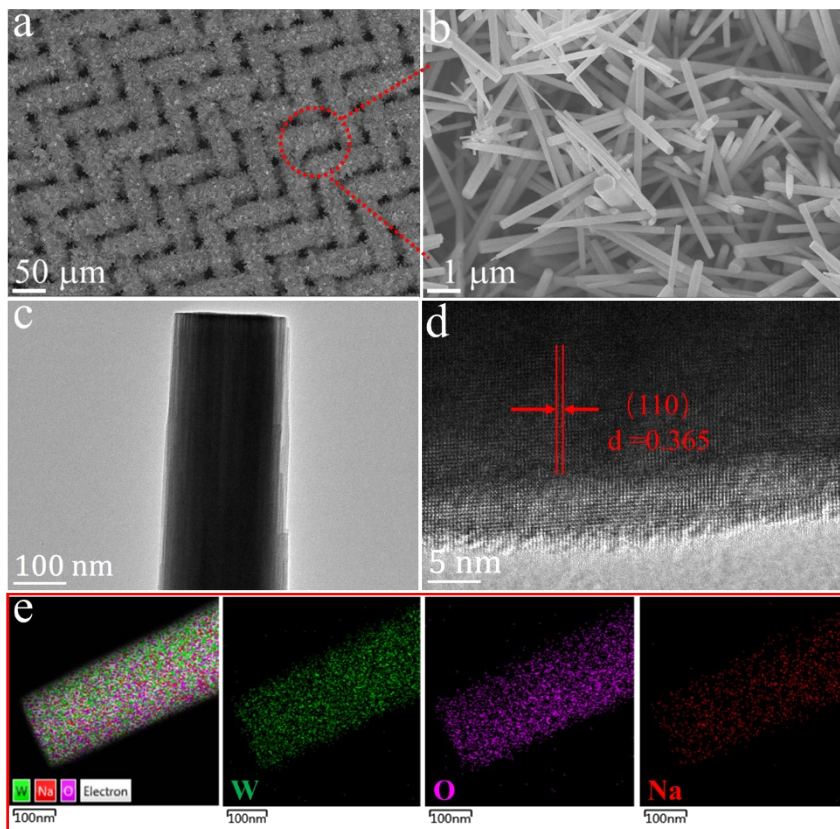

**Figure S3.** (a,b) FESEM images of R- $\text{Na}_x\text{WO}_3$  with different magnifications, (c,d) TEM and HRTEM of R- $\text{Na}_x\text{WO}_3$  nanotube bundles. (e) The corresponding EDX mappings for W, O, and Na, respectively.

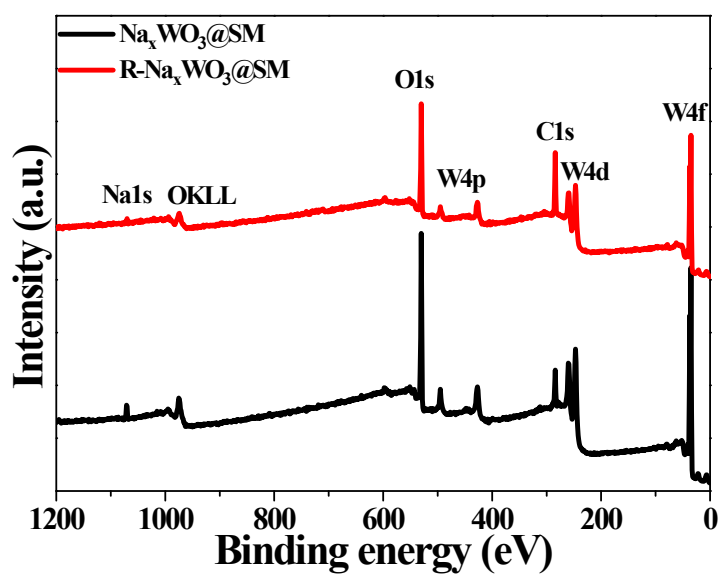

**Figure S4.** XPS survey of  $\text{Na}_x\text{WO}_3@SM$  and R- $\text{Na}_x\text{WO}_3@SM$

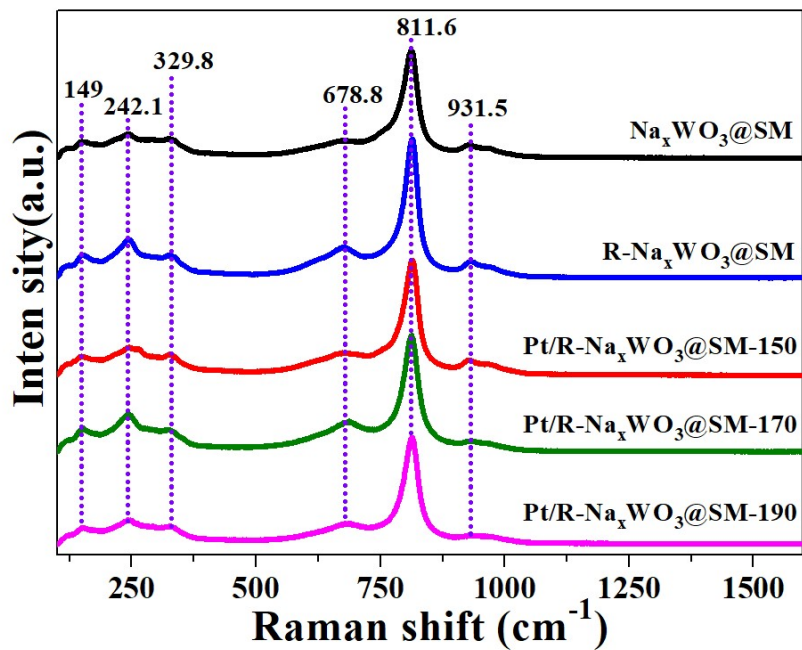

**Figure S5.** Raman spectra of Na<sub>x</sub>WO<sub>3</sub>@SM, R-Na<sub>x</sub>WO<sub>3</sub>@SM, Pt/R-Na<sub>x</sub>WO<sub>3</sub>@SM-150, Pt/R-Na<sub>x</sub>WO<sub>3</sub>@SM-170, and Pt/R-Na<sub>x</sub>WO<sub>3</sub>@SM-190.

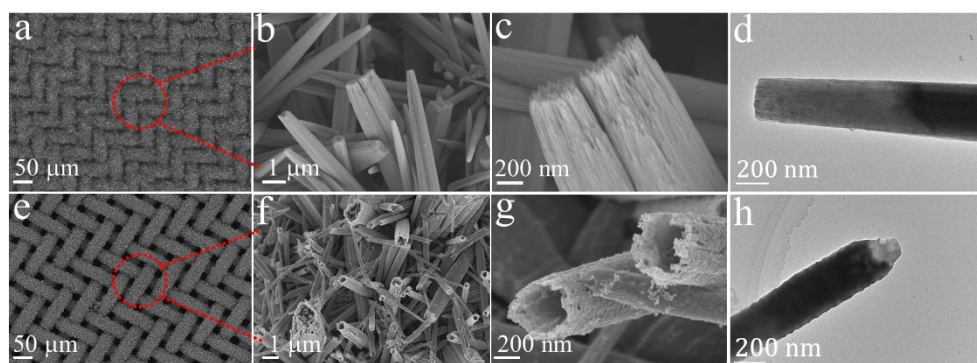

**Figure S6.** (a-c) FESEM images and (d) TEM image of Pt/R-Na<sub>x</sub>WO<sub>3</sub>@SM-150. (e-g) FESEM images and (h) TEM image of Pt/R-Na<sub>x</sub>WO<sub>3</sub>@SM-190.

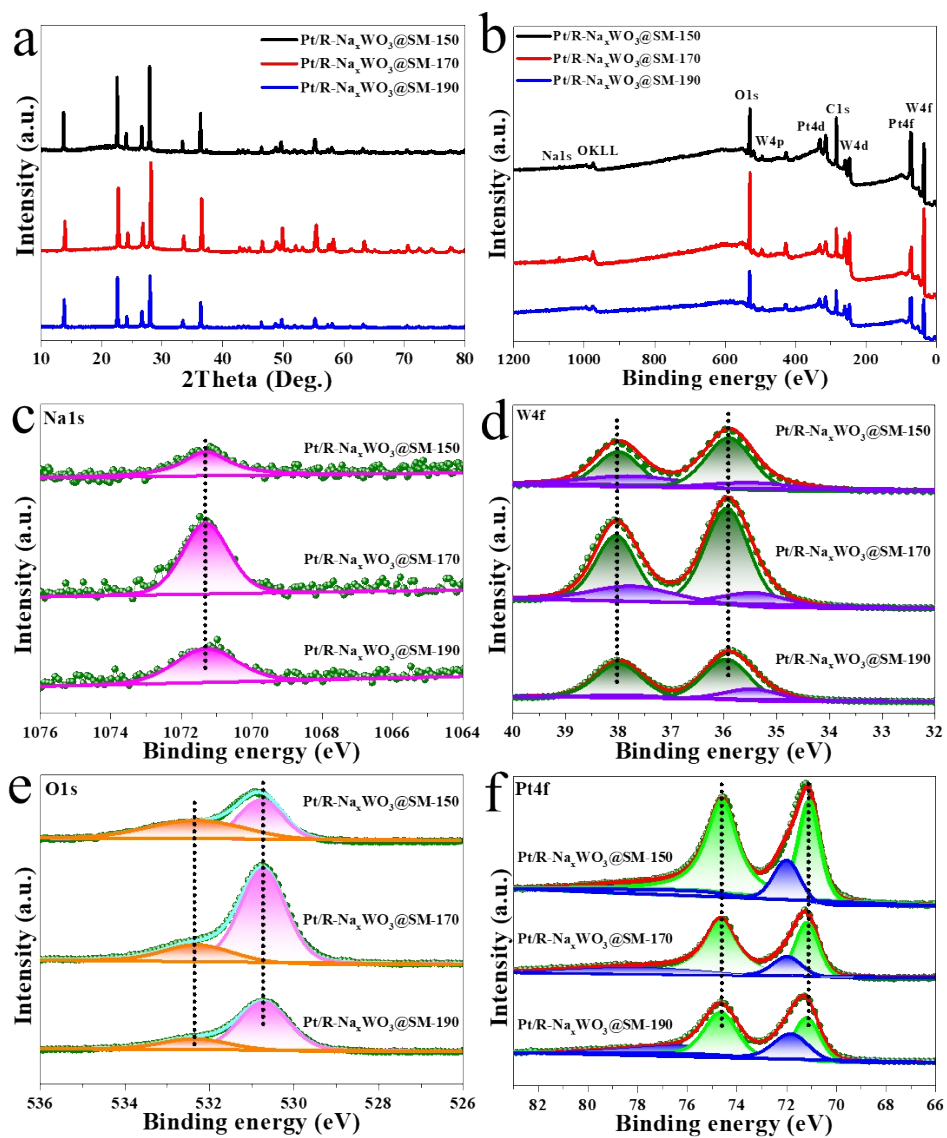

**Figure S7.** XRD pattern (a), XPS spectra (b), Na1s spectra (c), W4f spectra (d), O1s spectra (e), and Pt4f spectra (f) of Pt/R-Na<sub>x</sub>WO<sub>3</sub>@SM-150, Pt/R-Na<sub>x</sub>WO<sub>3</sub>@SM-170, and Pt/R-Na<sub>x</sub>WO<sub>3</sub>@SM-190, respectively.



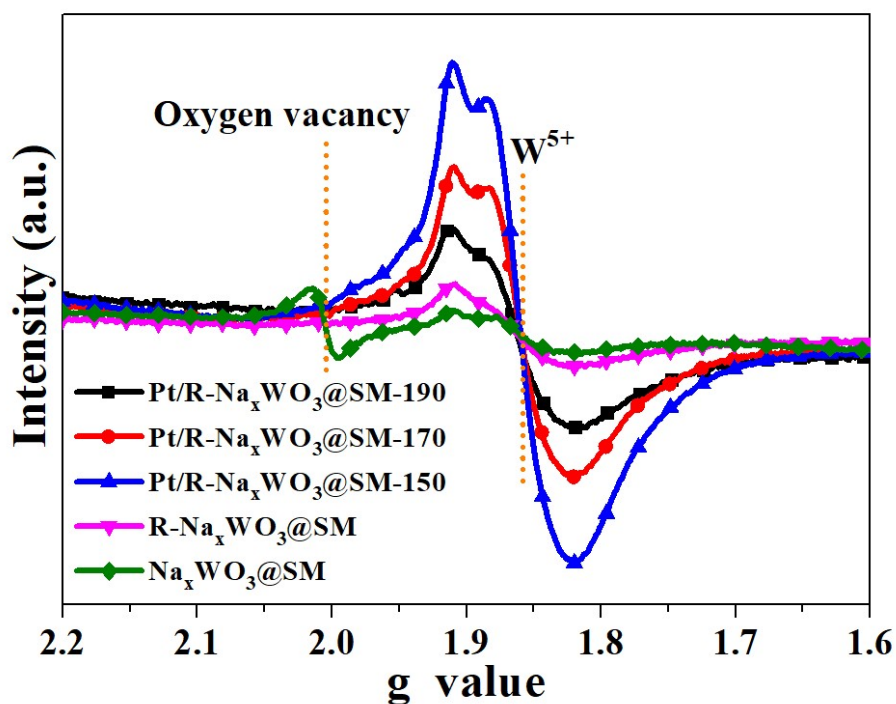

**Figure S8.** EPR spectra of Pt/R-Na<sub>x</sub>WO<sub>3</sub>@SM-190, Pt/R-Na<sub>x</sub>WO<sub>3</sub>@SM-170, Pt/R-Na<sub>x</sub>WO<sub>3</sub>@SM-150, R-Na<sub>x</sub>WO<sub>3</sub>@SM, and Na<sub>x</sub>WO<sub>3</sub>@SM, respectively.

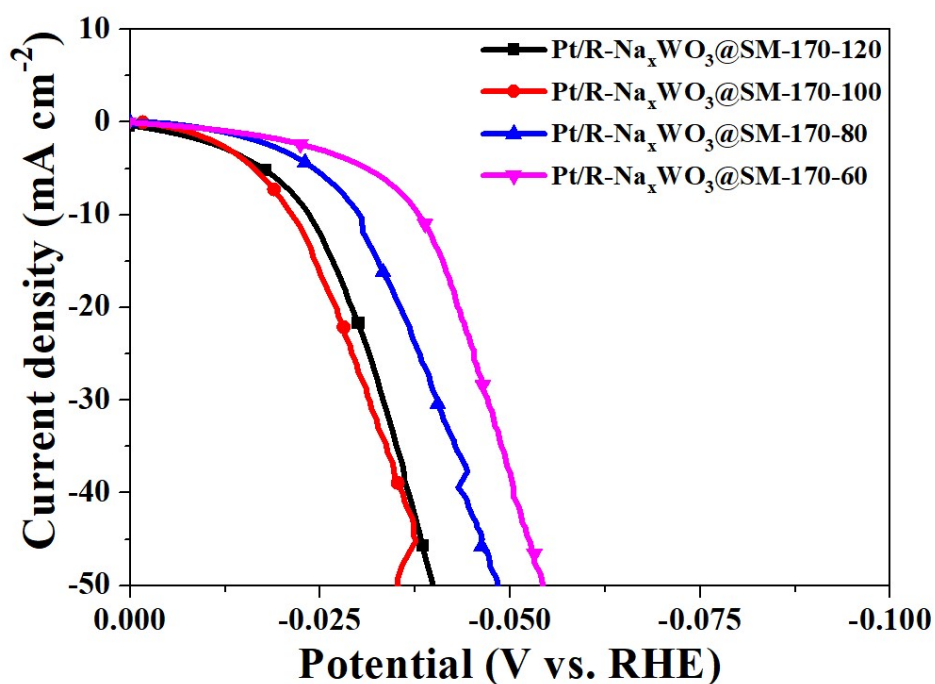

**Figure S9.** LSV curves of Pt/R-Na<sub>x</sub>WO<sub>3</sub>@SM-170-120, Pt/R-Na<sub>x</sub>WO<sub>3</sub>@SM-170-100, Pt/R-Na<sub>x</sub>WO<sub>3</sub>@SM-170-80, and Pt/R-Na<sub>x</sub>WO<sub>3</sub>@SM-170-60.

For optimizing the loading amount of Pt on the surface of R-Na<sub>x</sub>WO<sub>3</sub>, control

experiments were carried out by changing the volume of chloroplatinic acid with 120  $\mu\text{L}$ , 100  $\mu\text{L}$ , 80  $\mu\text{L}$ , and 60  $\mu\text{L}$  under the same operating condition, the as-synthesized samples are defined as Pt/R- $\text{Na}_x\text{WO}_3$ @SM-170-120, Pt/R- $\text{Na}_x\text{WO}_3$ @SM-170-100, Pt/R- $\text{Na}_x\text{WO}_3$ @SM-170-80, and Pt/R- $\text{Na}_x\text{WO}_3$ @SM-170-60, respectively.

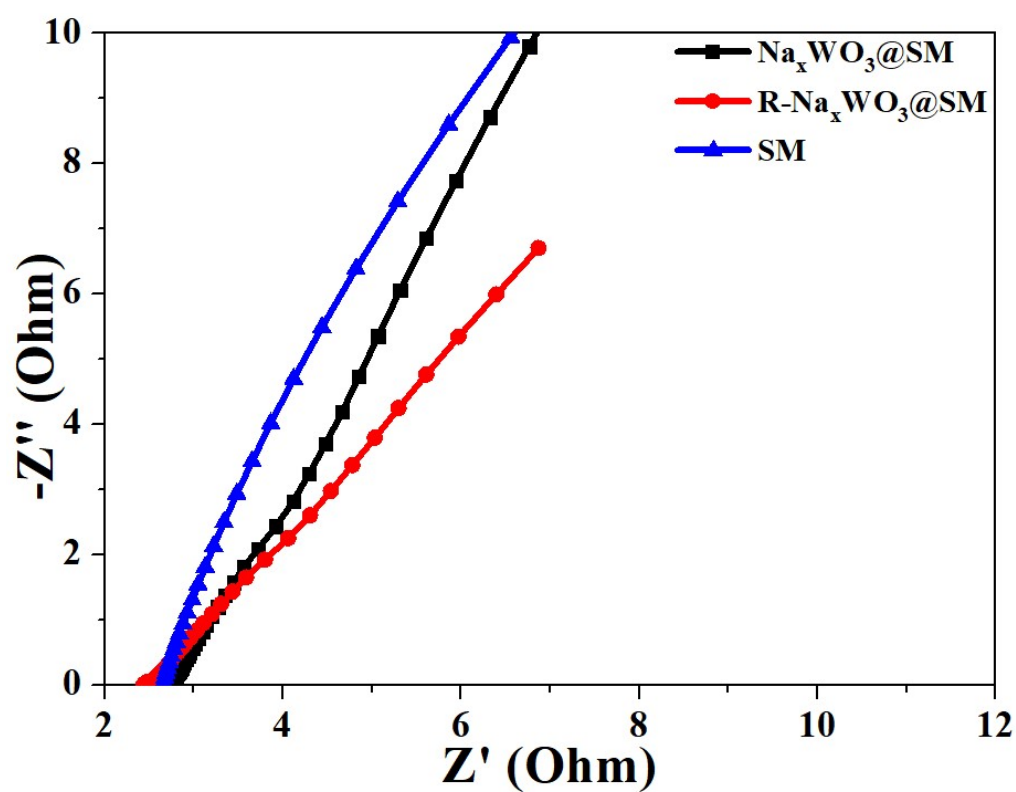

**Figure S10.** Electrochemical impedance plots for SM, R- $\text{Na}_x\text{WO}_3$ @SM, and  $\text{Na}_x\text{WO}_3$ @SM.

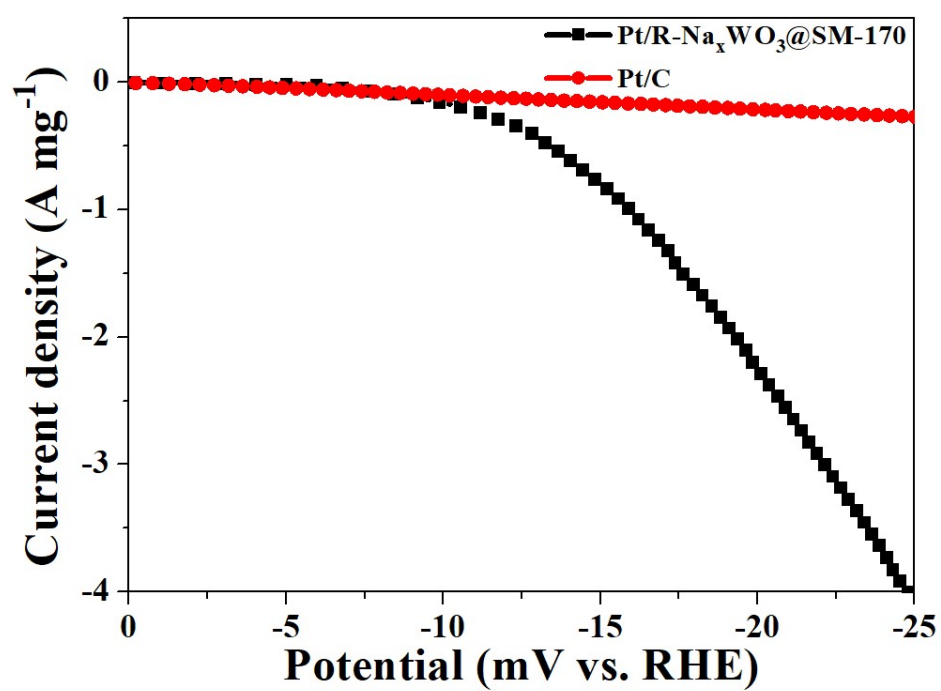

**Figure S11.** The polarization curves for Pt/R-Na<sub>x</sub>WO<sub>3</sub>@SM-170 and Pt/C in 0.5 M H<sub>2</sub>SO<sub>4</sub> with a scan rate of 2 mV s<sup>-1</sup>.



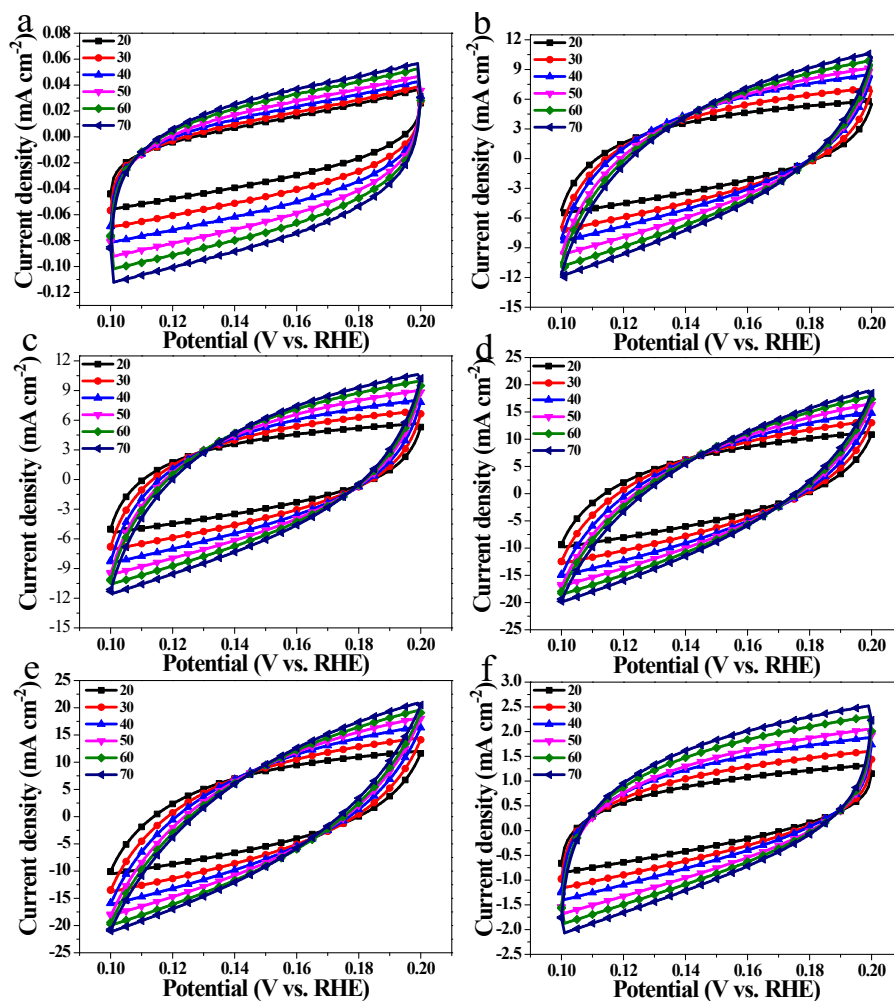

**Figure S12.** Cyclic voltammograms of (a) SM, (b) Na<sub>x</sub>WO<sub>3</sub>@SM, (c) R-Na<sub>x</sub>WO<sub>3</sub>@SM, (d) Pt/R-Na<sub>x</sub>WO<sub>3</sub>@SM-150, (e) Pt/R-Na<sub>x</sub>WO<sub>3</sub>@SM-170, and (f) Pt/R-Na<sub>x</sub>WO<sub>3</sub>@SM-190 samples in the non-faradaic capacitance current range at scan rates of 20, 30, 40, 50, 60, and 70 mV s<sup>-1</sup>.

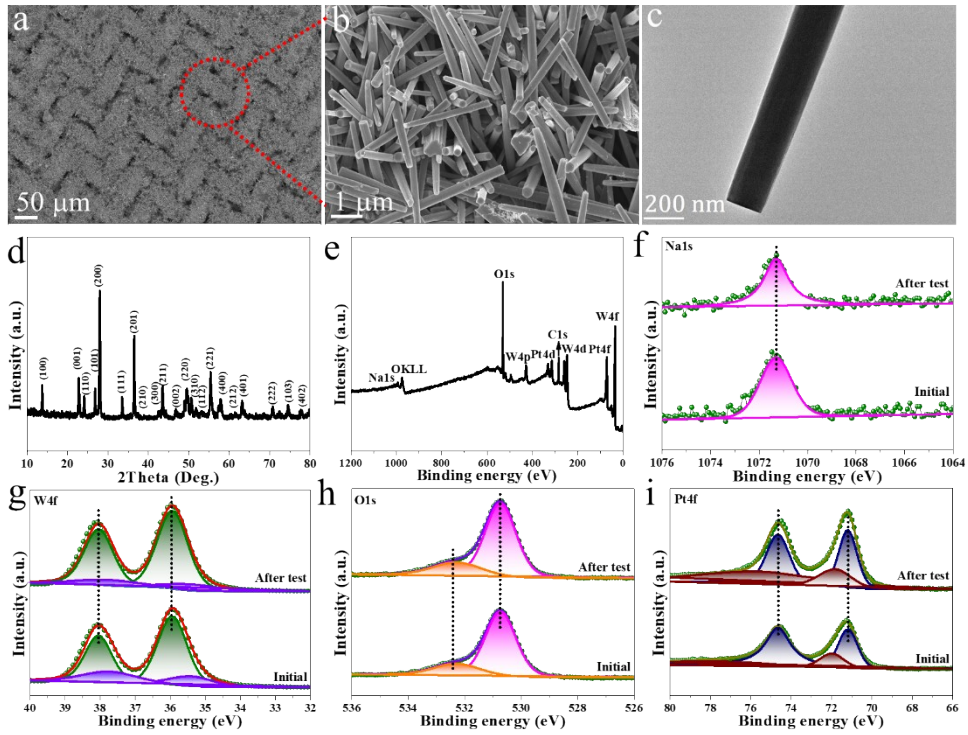

**Figure S13.** (a,b) FESEM images and (c) TEM image of Pt/R-Na<sub>x</sub>WO<sub>3</sub>@SM-170 after HER for 25 h. (d,e) XRD pattern and XPS spectra of Pt/R-Na<sub>x</sub>WO<sub>3</sub>@SM-170 after HER for 25 h. (f) Na 1s spectra, (g) W 4f spectra, (h) O 1s spectra, and (i) Pt 4f spectra of Pt/R-Na<sub>x</sub>WO<sub>3</sub>@SM-170 before and after stability test.

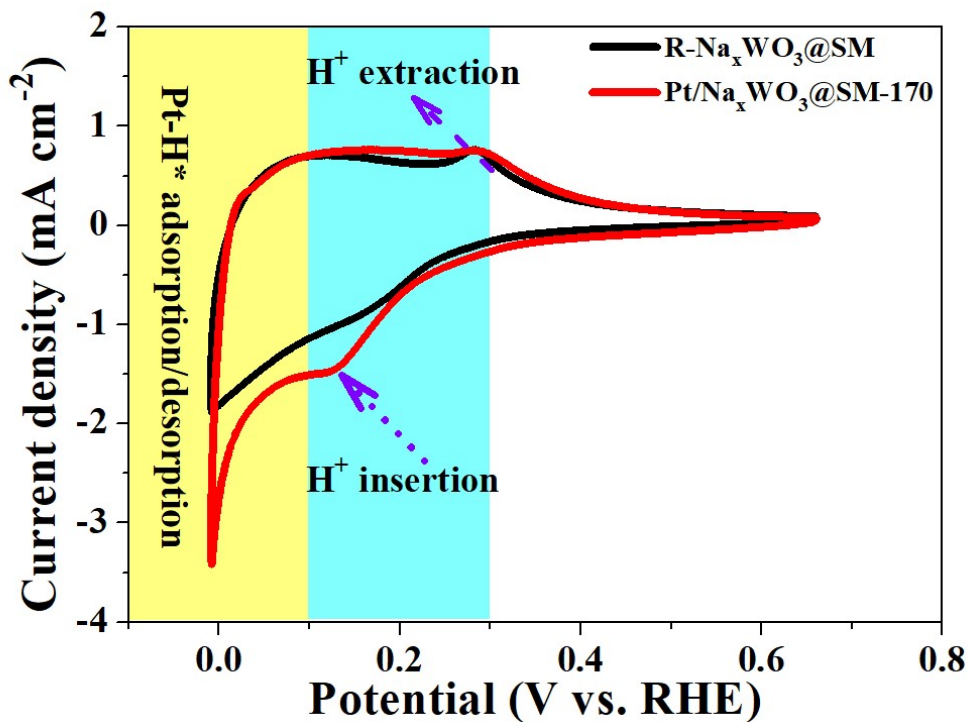

**Figure S14.** CV curves of Pt/R-Na<sub>x</sub>WO<sub>3</sub>@SM-170 and R-Na<sub>x</sub>WO<sub>3</sub>@SM at a scanning rate of 2 mV s<sup>-1</sup>.

**Table S1.** The ratio of W<sup>5+</sup>/W<sup>6+</sup> in Pt/R-Na<sub>x</sub>WO<sub>3</sub>@SM-150, Pt/R-Na<sub>x</sub>WO<sub>3</sub>@SM-170, and Pt/R-Na<sub>x</sub>WO<sub>3</sub>@SM-190.

|                                      | Pt/R-Na <sub>x</sub> WO <sub>3</sub> @SM-150 | Pt/R-Na <sub>x</sub> WO <sub>3</sub> @SM-170 | Pt/R-Na <sub>x</sub> WO <sub>3</sub> @SM-190 |
|--------------------------------------|----------------------------------------------|----------------------------------------------|----------------------------------------------|
| <b>W<sup>5+</sup>/W<sup>6+</sup></b> | 37.7%                                        | 30.3%                                        | 23.7%                                        |

**Table S2.** Electrocatalytic HER parameters of Pt/R-Na<sub>x</sub>WO<sub>3</sub>@SM-170 fabricated in this work and Pt-based catalysts reported previously at 10 mA cm<sup>-2</sup> in 0.5 M H<sub>2</sub>SO<sub>4</sub>.

| Catalysts                                    | Overpotential<br>(mV) | Tafel slope<br>(mV dec <sup>-1</sup> ) | References |
|----------------------------------------------|-----------------------|----------------------------------------|------------|
| Pt/R-Na <sub>x</sub> WO <sub>3</sub> @SM-170 | 20                    | 18.6                                   | This work  |
| Pt-SA/ML-WO <sub>3</sub> -300                | 25                    | 27                                     | 1          |

|                                                       |       |       |    |
|-------------------------------------------------------|-------|-------|----|
| Pt/WO <sub>3</sub>                                    | 39    | 32.3  | 2  |
| Pt-MoS <sub>2</sub>                                   | 50    | 40    | 3  |
| Pt-SA/m-WO <sub>3-x</sub>                             | 47    | 45    | 4  |
| Pt <sub>1</sub> /MoO <sub>3</sub>                     | 23.3  | 28.8  | 5  |
| Pt-SA/ $\alpha$ -MoO <sub>x</sub>                     | 19    | 123   | 6  |
| Pt Cs/MoO <sub>2</sub> NSs                            | 47    | 33    | 7  |
| PtN <sub>x</sub> /TiO <sub>2</sub>                    | 67    | 34    | 8  |
| Pt-PVP/TNR                                            | 21    | 27    | 9  |
| Pt/def-WO <sub>3</sub> @CFC                           | 42    | 61    | 10 |
| EG-Pt/CoP-1.5                                         | 21    | 42.5  | 11 |
| Pt/RuCeO <sub>x</sub> -PA                             | 41    | 31    | 12 |
| PtW <sub>6</sub> O <sub>24</sub> /C                   | 22    | 29.8  | 13 |
| Pt/Ti <sub>0.9</sub> Mo <sub>0.1</sub> O <sub>2</sub> | 26    | 36    | 14 |
| Pt@Co SAs-ZIF-NC                                      | 27    | 21    | 15 |
| Pt <sub>61</sub> La <sub>39</sub> @KB                 | 38    | 29    | 16 |
| Mo <sub>2</sub> C@NC@Pt                               | 27    | 28    | 17 |
| AL-Pt/Pd <sub>3</sub> Pb                              | 13.8  | 18    | 18 |
| Pt/f-MWCNTs                                           | 43.9  | 30    | 19 |
| CoPt <sub>2</sub>                                     | 17    | 35    | 20 |
| Pt/GNs                                                | 25    | 33    | 21 |
| Pd@PtCu/C                                             | 60    | 26.2  | 22 |
| Pt <sub>3.21</sub> Ni@Ti <sub>3</sub> C <sub>2</sub>  | 18.55 | 13.37 | 23 |
| PtW NPs                                               | 19.4  | 27.8  | 24 |
| Pt-Pd@NPA                                             | 28.1  | 31.2  | 25 |
| Pt@MoS <sub>2</sub> /NiS <sub>2</sub>                 | 34    | 40    | 26 |

|                                                          |    |      |    |
|----------------------------------------------------------|----|------|----|
| Pt/NBF-ReS <sub>2</sub> /Mo <sub>2</sub> CT <sub>x</sub> | 29 | 24   | 27 |
| PtRu/CC <sub>1500</sub>                                  | 8  | 25   | 28 |
| Pt-HNCNT                                                 | 15 | 29.1 | 29 |
| PtCu/CoP                                                 | 20 | 28   | 30 |
| Pt <sub>1</sub> /OLC                                     | 38 | 36   | 31 |
| Ni-MOF@Pt                                                | 43 | 30   | 32 |
| PtCNP <sub>2</sub>                                       | 22 | 31.2 | 33 |

## References

1. D. Wang, H. Li, N. Du and W. Hou, *Adv. Funct. Mater.*, 2021, **31**, 2009770.
2. C. Xie, W. Chen, S. Du, D. Yan, Y. Zhang, J. Chen, B. Liu and S. Wang, *Nano Energy*, 2020, **71**, 104653.
3. X. Huang, Z. Zeng, S. Bao, M. Wang, X. Qi, Z. Fan and H. Zhang, *Nat. Commun.*, 2013, **4**, 1444.
4. J. Park, S. Lee, H. E. Kim, A. Cho, S. Kim, Y. Ye, J. W. Han, H. Lee, J. H. Jang and J. Lee, *Angew. Chem. Int. Ed.*, 2019, **58**, 16038-16042.
5. W. Liu, Q. Xu, P. Yan, J. Chen, Y. Du, S. Chu and J. Wang, *ChemCatChem*, 2018, **10**, 946-950.
6. J. Xu, C. Zhang, H. Liu, J. Sun, R. Xie, Y. Qiu, F. Lü, Y. Liu, L. Zhuo, X. Liu and J. Luo, *Nano Energy*, 2020, **70**, 104529.
7. X. Li, J. Yu, J. Jia, A. Wang, L. Zhao, T. Xiong, H. Liu and W. Zhou, *Nano Energy*, 2019, **62**, 127-135.
8. J. Guan, X. Bai and T. Tang, *Nano Res.*, 2021, **15**, 818-837.
9. C. Li, Z. Chen, H. Yi, Y. Cao, L. Du, Y. Hu, F. Kong, R. Kramer Campen, Y.

- Gao, C. Du, G. Yin, I. Y. Zhang and Y. Tong, *Angew. Chem. Int. Ed.*, 2020, **132**, 16036-16041.
10. H. Tian, X. Cui, L. Zeng, L. Su, Y. Song and J. Shi, *J. Mater. Chem. A*, 2019, **7**, 6285-6293.
  11. J. Li, H.-X. Liu, W. Gou, M. Zhang, Z. Xia, S. Zhang, C.-R. Chang, Y. Ma and Y. Qu, *Energy Environ. Sci.*, 2019, **12**, 2298-2304.
  12. H. Sun, Z. Yan, F. Liu, W. Xu, F. Cheng and J. Chen, *Adv. Mater.*, 2020, **32**, 1806326.
  13. F. Y. Yu, Z. L. Lang, L. Y. Yin, K. Feng, Y. J. Xia, H. Q. Tan, H. T. Zhu, J. Zhong, Z. H. Kang and Y. G. Li, *Nat. Commun.*, 2020, **11**, 490.
  14. K. Chen, S. Deng, Y. Lu, M. Gong, Y. Hu, T. Zhao, T. Shen and D. Wang, *Chin. Chem. Lett.*, 2021, **32**, 765-769.
  15. L. Liang, H. Jin, H. Zhou, B. Liu, C. Hu, D. Chen, Z. Wang, Z. Hu, Y. Zhao, H.-W. Li, D. He and S. Mu, *Nano Energy*, 2021, **88**, 106221.
  16. N. Nie, D. Zhang, Z. Wang, Y. Qin, X. Zhai, B. Yang, J. Lai and L. Wang, *Small*, 2021, **17**, 2102879.
  17. J. Q. Chi, J. Y. Xie, W. W. Zhang, B. Dong, J. F. Qin, X. Y. Zhang, J. H. Lin, Y. M. Chai and C. G. Liu, *ACS Appl. Mater. Interfaces*, 2019, **11**, 4047-4056.
  18. Y. Yao, X. K. Gu, D. He, Z. Li, W. Liu, Q. Xu, T. Yao, Y. Lin, H. J. Wang, C. Zhao, X. Wang, P. Yin, H. Li, X. Hong, S. Wei, W. X. Li, Y. Li and Y. Wu, *J. Am. Chem. Soc.*, 2019, **141**, 19964-19968.
  19. J. Ji, Y. Zhang, L. Tang, C. Liu, X. Gao, M. Sun, J. Zheng, M. Ling, C. Liang



- and Z. Lin, *Nano Energy*, 2019, **63**, 103849.
20. L. Lin, Z. Sun, H. Yao, M. Yuan, H. Yang, H. Li, Q. Zhang, D. Wang, L. Gu, G. Sun, J. Zhu, W. Fang and Z. Tang, *J. Phys. Chem. C*, 2019, **123**, 29722-29728.
  21. X. Yan, H. Li, J. Sun, P. Liu, H. Zhang, B. Xu and J. Guo, *Carbon*, 2018, **137**, 405-410.
  22. M. Bao, I. S. Amiin, T. Peng, W. Li, S. Liu, Z. Wang, Z. Pu, D. He, Y. Xiong and S. Mu, *ACS Energy Lett.*, 2018, **3**, 940-945.
  23. Y. Jiang, X. Wu, Y. Yan, S. Luo, X. Li, J. Huang, H. Zhang and D. Yang, *Small*, 2019, **15**, 1805474.
  24. D. Kobayashi, H. Kobayashi, D. Wu, S. Okazoe, K. Kusada, T. Yamamoto, T. Toriyama, S. Matsumura, S. Kawaguchi, Y. Kubota, S. M. Aspera, H. Nakanishi, S. Arai and H. Kitagawa, *J. Am. Chem. Soc.*, 2020, **142**, 17250-17254.
  25. C. Yang, H. Lei, W. Z. Zhou, J. R. Zeng, Q. B. Zhang, Y. X. Hua and C. Y. Xu, *J. Mater. Chem. A*, 2018, **6**, 14281-14290.
  26. Y. Guan, Y. Feng, J. Wan, X. Yang, L. Fang, X. Gu, R. Liu, Z. Huang, J. Li, J. Luo, C. Li and Y. Wang, *Small*, 2018, **14**, 1800697.
  27. M. Yi, N. Li, B. Lu, L. Li, Z. Zhu and J. Zhang, *Energy Stor. Mater.*, 2021, **42**, 418-429.
  28. L. Li, G. Zhang, B. Wang, T. Yang and S. Yang, *J. Mater. Chem. A*, 2020, **8**, 2090-2098.

29. L. Zhang, Q. Wang, R. Si, Z. Song, X. Lin, M. N. Banis, K. Adair, J. Li, K. Doyle-Davis, R. Li, L. M. Liu, M. Gu and X. Sun, *Small*, 2021, **17**, 2004453.
30. J. Gao, X. Tang, P. Du, H. Li, Q. Yuan, G. Xie and H.-J. Qiu, *Sustain. Energy Fuels*, 2020, **4**, 2551-2558.
31. D. Liu, X. Li, S. Chen, H. Yan, C. Wang, C. Wu, Y. A. Haleem, S. Duan, J. Lu, B. Ge, P. M. Ajayan, Y. Luo, J. Jiang and L. Song, *Nat. Energy*, 2019, **4**, 512-518.
32. K. Rui, G. Zhao, M. Lao, P. Cui, X. Zheng, X. Zheng, J. Zhu, W. Huang, S. X. Dou and W. Sun, *Nano Lett.*, 2019, **19**, 8447-8453.
33. F. Nichols, Q. Liu, J. Sandhu, Z. Azhar, R. Cazares, R. Mercado, F. Bridges and S. Chen, *J. Mater. Chem. A*, 2022, DOI: 10.1039/d1ta06240a,
